# Supplementary material for: Enhancing the material performance of chloroprene rubber (CR) by strategic incorporation of zirconia
Source: Royal Society of Chemistry journal article supplement (doi:10.1039/d1ma00793a), 2022-01-01
Supplement: d1ma00793a1.pdf [file d1ma00793a1.pdf]

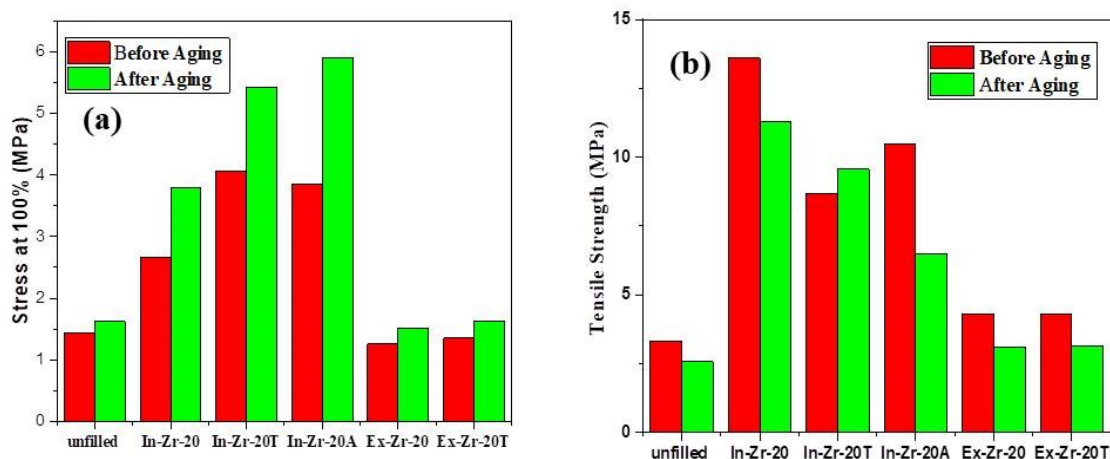

**Fig. S1:** The mechanical testing of unfilled and filled composites before and after aging in terms of (a) stress at 100% elongation (b) tensile strength.

**Table S1:** The concentration of Oxygen and Zirconium (Zr) calculated from EDX study.

| Sample Code      | Wt.% of O | At. % of O | Wt.% of Zr | At.% of Zr |
|------------------|-----------|------------|------------|------------|
| <b>In-Zr-20</b>  | 42.59     | 80.88      | 57.41      | 19.12      |
| <b>In-Zr-20T</b> | 31.15     | 72.06      | 68.85      | 27.94      |
| <b>In-Zr-20A</b> | 38.1      | 77.82      | 61.9       | 22.18      |
| <b>Ex-Zr-20T</b> | 36.76     | 76.82      | 63.24      | 23.18      |
